# Supplementary material for: Combinatorial Analysis of Phenotypic and Clinical Risk Factors Associated With Hospitalized COVID-19 Patients
Source: PubMed Central journal article supplement (PMC8521999; doi:10.3389/fdgth.2021.660809), 2021-07-08
Supplement: Data_Sheet_1.pdf [file Data_Sheet_1.pdf]

## Supplementary Material for Combinatorial analysis of phenotypic and clinical risk factors associated with hospitalized COVID-19 patients

Sayoni Das<sup>1,†</sup>, Matthew Pearson<sup>1,†</sup>, Krystyna Taylor<sup>1</sup>, Veronique Bouchet<sup>1</sup>, Gert Lykke Møller<sup>1</sup>, Taryn O. Hall<sup>2</sup>, Mark Strivens<sup>1</sup>, Kathy T. H. Tzeng<sup>2</sup>, Steve Gardner<sup>1,\*</sup>

<sup>1</sup> PrecisionLife Ltd., Oxford, United Kingdom

<sup>2</sup> OptumLabs at UnitedHealth Group, Minnetonka, MN, United States

\* **Correspondence:** Steve Gardner [steve@precisionlife.com](mailto:steve@precisionlife.com)

† These authors have contributed equally to this work.

### 1 Mining Terminology and Example

The overall process of mining, validation and scoring is shown below.

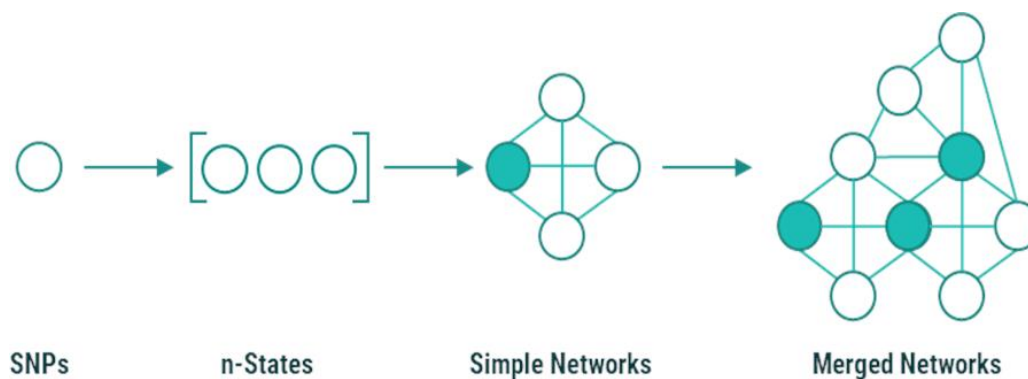

**Supplementary Figure 1.** Stages of the mining, scoring and analysis process in PrecisionLife's combinatorial analytics platform.

## 2 Supplementary Data

**Supplementary Table 1.** COVID-19 positive patient records available in the UnitedHealth Group (UHG) COVID-19 Data Suite.

|                                                                                                      | <b>Hospitalized patients</b> | <b>Non-hospitalized patients</b> |
|------------------------------------------------------------------------------------------------------|------------------------------|----------------------------------|
| COVID-19 positive patients                                                                           | 37,027                       | 219,271                          |
| COVID-19 patients with any clinical data since 2019                                                  | 19,244                       | 28,408                           |
| Cohort 1 - COVID-19 patients with clinical data who were not enrolled in Medicare Special Needs Plan | 3,183                        | 6,310                            |
| Cohort 2 - Cohort 1 patients with additional laboratory data for 5 lab analytes                      | 581                          | 1,000                            |

**Supplementary Table 2.** Features used for hospitalization risk studies.

| <b>Feature group</b>                           | <b>Data source</b>                                           | <b>Description</b>                                                                                                                                                 | <b>Feature count</b> |
|------------------------------------------------|--------------------------------------------------------------|--------------------------------------------------------------------------------------------------------------------------------------------------------------------|----------------------|
| Sex                                            | Member information                                           | 1 indicates Male, 0 indicates Female, 3 indicates missing data                                                                                                     | 1                    |
| Race                                           | Member information                                           | 1 indicates non-Caucasian, 0 indicates Caucasian and 3 indicates missing data.                                                                                     | 1                    |
| Co-morbidity flags based on Co-morbidity Index | Co-morbidity scores table derived by UHG from medical claims | 1 indicates incidence of at least one claim associated with co-morbidity flag since 2019 and 0 indicates its absence.                                              | 32                   |
| ICD-10-CM level 2 codes                        | Medical claim                                                | ICD-10-CM level 2 codes (excluding those used as co-morbidity flags) occurring in at least one medical claim since 2019 are indicated by 1 and their absence by 0. | 1,018                |
| Medications                                    | Pharmacy claim                                               | 1 indicates incidence of at least one claim associated with the therapeutic class of medication since 2019 and 0 indicates its absence.                            | 282                  |
| Age                                            | Member information                                           | Values above 0.5 SD were assigned 1 and those below 0.5 SD were assigned 0. Values in between were considered missing and assigned the value 3.                    | 1                    |
| Risk scores based on Co-morbidity index        |                                                              | Same as age                                                                                                                                                        | 4                    |
| Lab analytes                                   | Lab data                                                     | Same as age                                                                                                                                                        | 5                    |

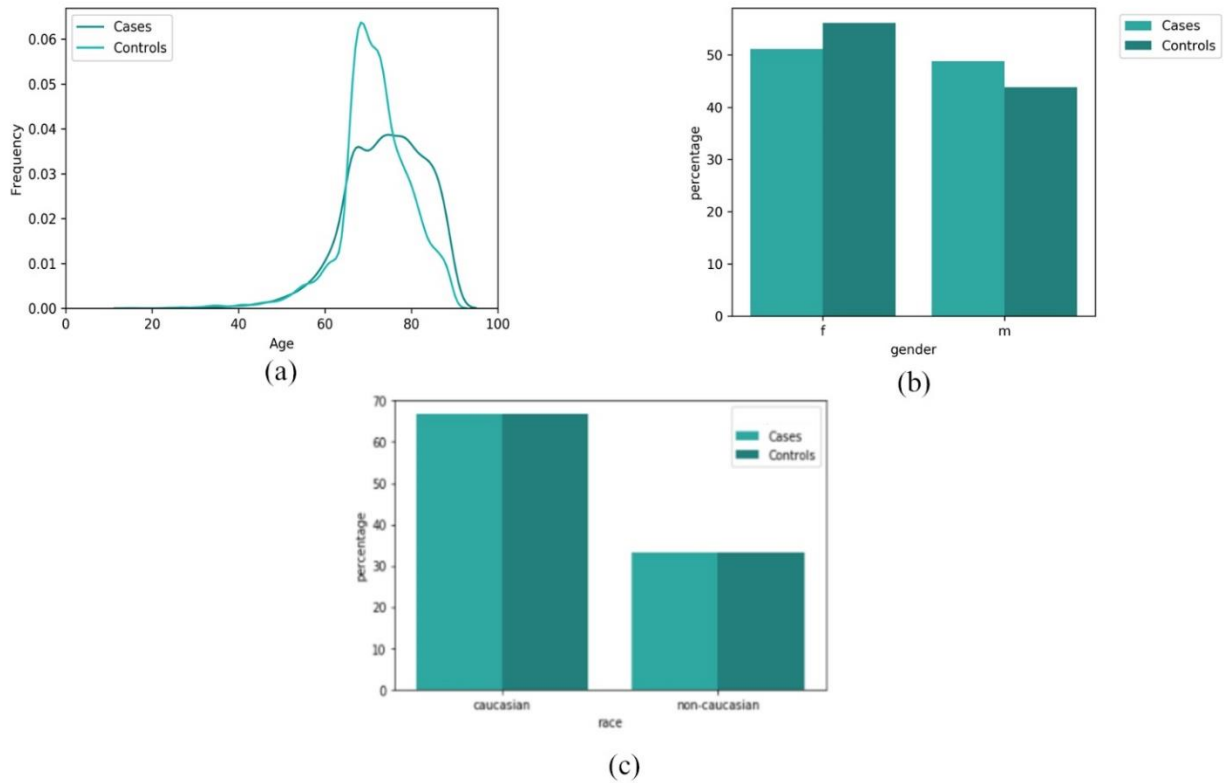

**Supplementary Figure 2.** Distribution of (a) age, (b) gender and (c) race for the full hospitalization risk cohort (Cohort 1, n=9,493 comprising of 3,183 cases and 6,310 controls).

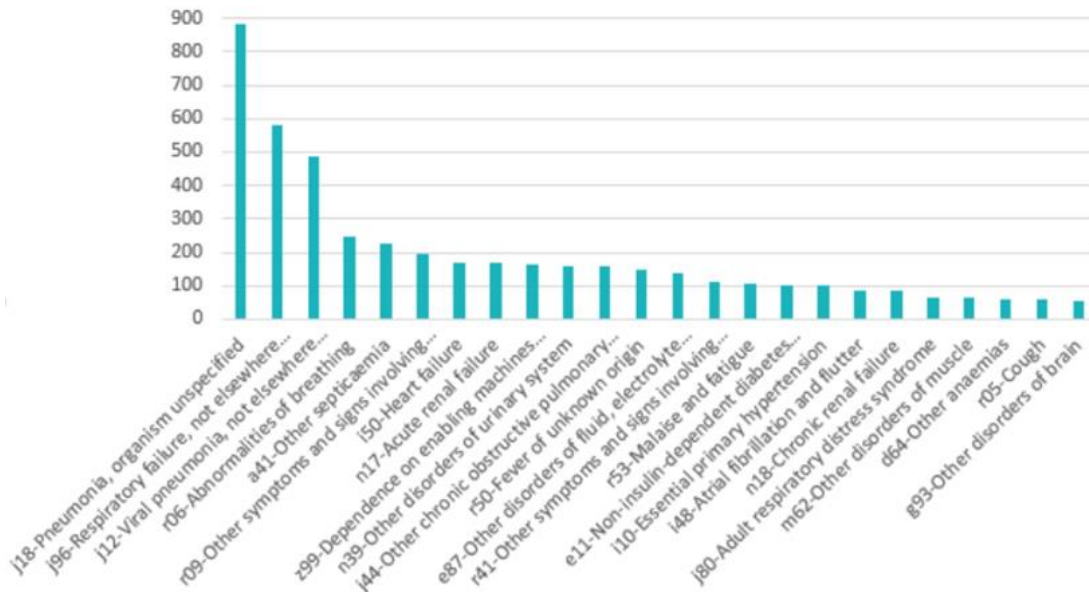

**Supplementary Figure 3.** Most frequently associated diagnoses associated with COVID-19 patients during their hospitalization in the full hospitalization risk cohort (Cohort 1).

**Supplementary Table 3.** Summary of combinatorial analysis results for the Hospitalization risk studies.

|                                                  | <b>Cohort 1</b>                         | <b>Cohort 2</b>                     |
|--------------------------------------------------|-----------------------------------------|-------------------------------------|
| <b>Cases</b>                                     | 3,183<br>(males: 1,549, females: 1,634) | 581<br>(males: 295, females: 286)   |
| <b>Controls</b>                                  | 6,310<br>(males: 2,758, females: 3,538) | 1,000<br>(males: 438, females: 560) |
| <b>Features</b>                                  | 1,339                                   | 1,344                               |
| <b>False Discovery Rate (FDR)</b>                | 0.01                                    | 0.01                                |
| <b>Random Permutations</b>                       | 2,500                                   | 2,500                               |
| <b>Disease Signatures (N-states)</b>             | 1,147                                   | 32,242                              |
| <b>Penetrance</b>                                | 67.29%                                  | 82.61%                              |
| <b>Filtered Disease Signatures</b>               | 255                                     | 531                                 |
| <b>Penetrance of Filtered Disease Signatures</b> | 54.97%                                  | 59.72%                              |
| <b>Critical features</b>                         | 166                                     | 41                                  |

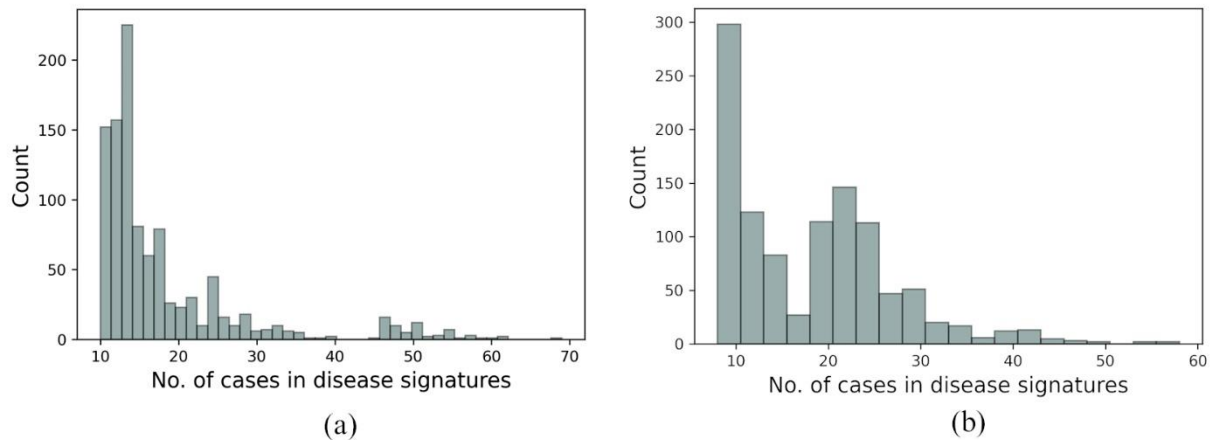**Supplementary Figure 4.** Distribution of cases in COVID-19 disease signatures (excluding signatures that had any feature indicating absence of a disease diagnosis, symptom or medication) identified in (a) Cohort 1) and (b) Cohort 2.

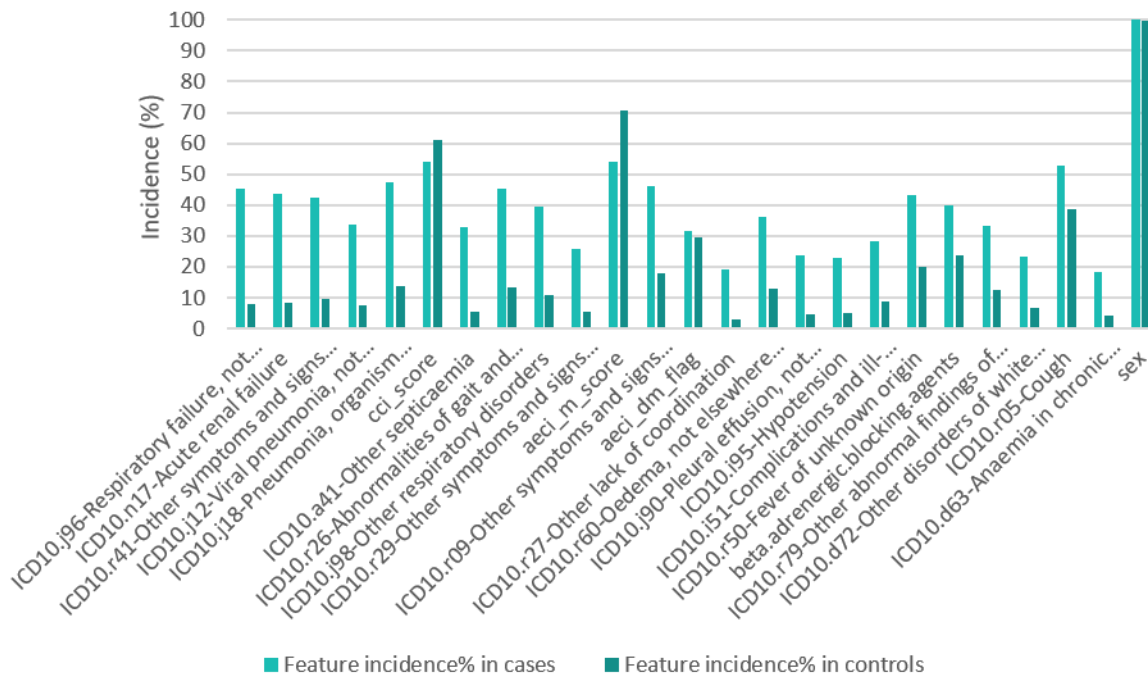

(a)

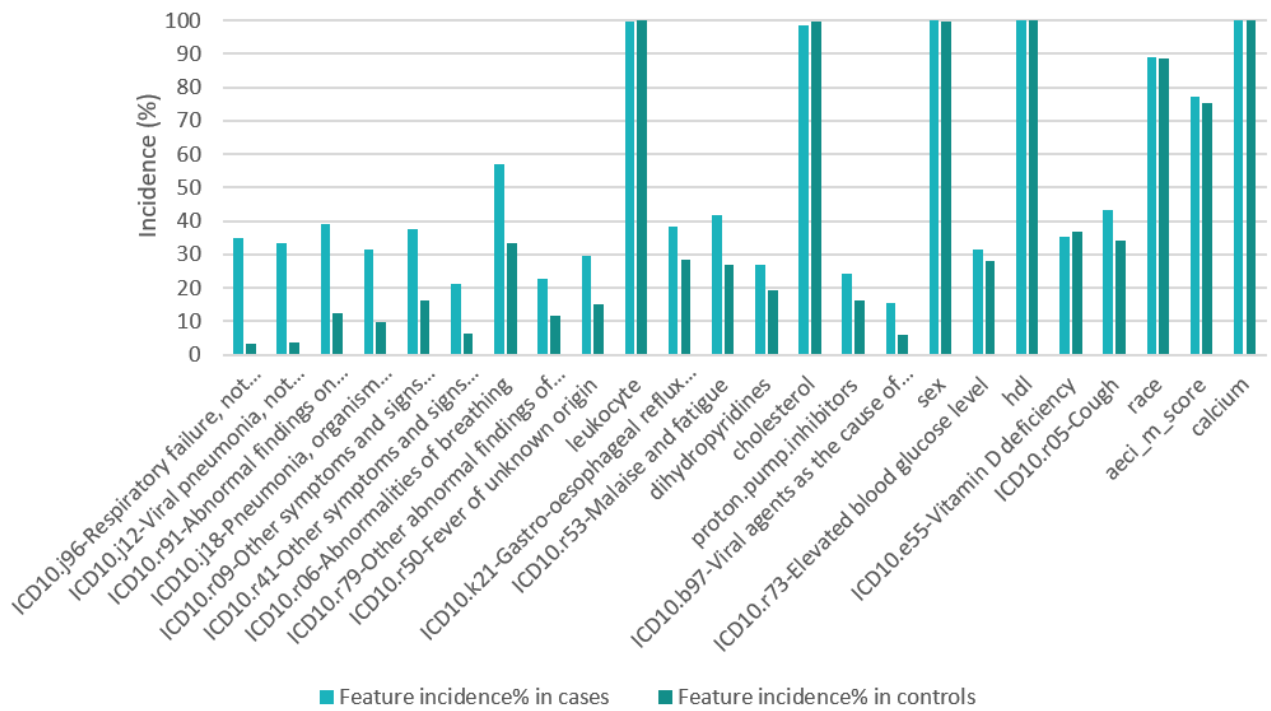

(b)

**Supplementary Figure 5.** Incidence of the top Random Forest (RF) scored critical features in cases and controls for (a) Cohort 1 and (b) Cohort 2.

**Supplementary Table 4.** Incidence of features derived from laboratory test results of patients in the cohort for the hospitalized risk study using lab data. *p-values* were calculated to assess the association of each feature in the two COVID-19 hospitalized risk cohorts using two-sided Fisher's exact tests.

| Lab analyte (normal range)                | Lab analyte feature | Lab feature definition            | Cases (n=581) | Controls (n=1000) | Two-sided <i>p-value</i> | One-sided <i>p-value</i> (lesser) | Disease signatures |
|-------------------------------------------|---------------------|-----------------------------------|---------------|-------------------|--------------------------|-----------------------------------|--------------------|
| Calcium (8.6-10 mg/dl)                    | Calcium:0           | < 9.26 mg/dl in serum plasma      | 289           | 770               | 0.0047                   | 0.0024                            | 18                 |
|                                           | Calcium:1           | > 9.71 mg/dl in serum plasma      | 231           | 823               | 0.0047                   | 0.998                             | 4                  |
| LDL (100 -129 mg/dl)                      | LDL:0               | < 78.23 mg/dl in serum plasma     | 345           | 858               | 4.5e-09                  | 2.8e-09                           | 26                 |
|                                           | LDL:1               | >114.37 mg/dl in serum plasma     | 224           | 984               | 4.5e-09                  | 1                                 | 0                  |
| HDL (40-60 mg/dl)                         | HDL:0               | < 44.35 mg/dl in serum plasma     | 386           | 971               | 8.4e-10                  | 4.2e-10                           | 15                 |
|                                           | HDL:1               | > 66.16 mg/dl in serum plasma     | 188           | 871               | 8.4e-10                  | 1                                 | 4                  |
| Triglycerides (100-150 mg/dl)             | Triglycer:0         | < 73.05 mg/dl in serum plasma     | 122           | 553               | 0.0002                   | 0.9999                            | 6                  |
|                                           | Triglycer:1         | > 206.20 mg/dl in serum plasma    | 150           | 404               | 0.0002                   | 0.00105                           | 0                  |
| Leukocyte count (5-10 k/mm <sup>3</sup> ) | Leukocyte:0         | < 5.28 k/mm <sup>3</sup> in blood | 194           | 831               | 9.2e-09                  | 3.9e-89                           | 8                  |
|                                           | Leukocyte:1         | > 8.17 k/mm <sup>3</sup> in blood | 240           | 542               | 9.2e-09                  | 4.79e-07                          | 9                  |

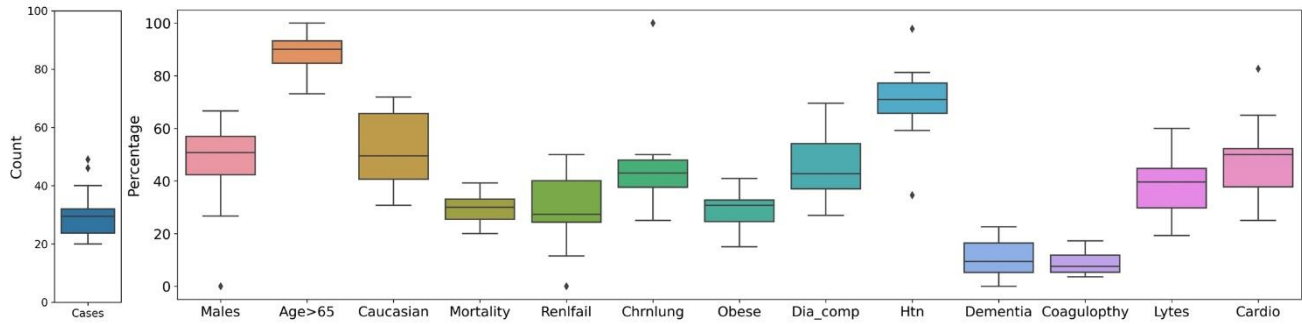

**Supplementary Figure 6.** Clinical characteristics of the disease signatures of hospitalized patients in Cohort 1 who had developed ARDS. Each boxplot captures the distribution of the incidence of a clinical feature in all ARDS disease signatures.

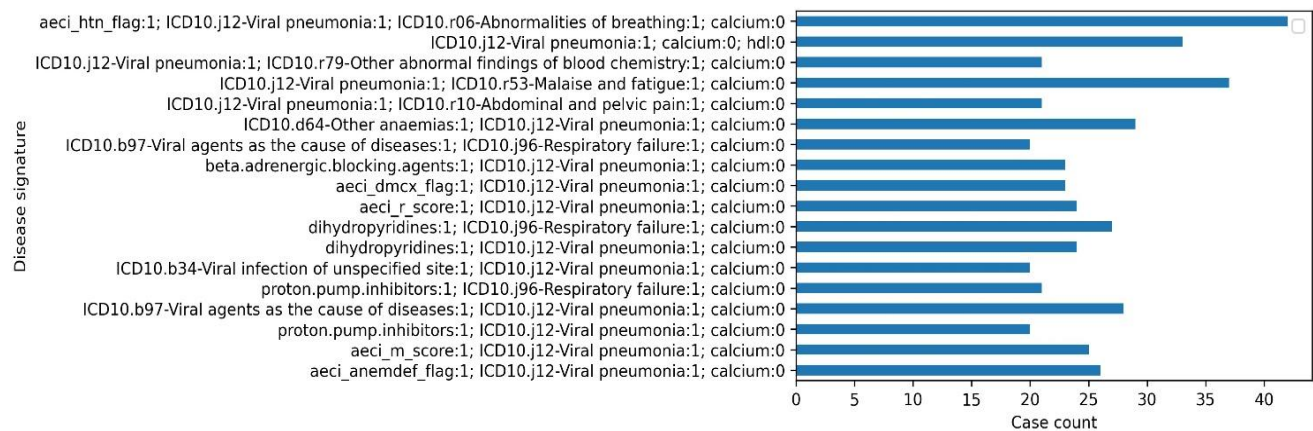

**Supplementary Figure 7.** Disease signatures with serum calcium levels below 9.11 mg/dl reported in Cohort 2.

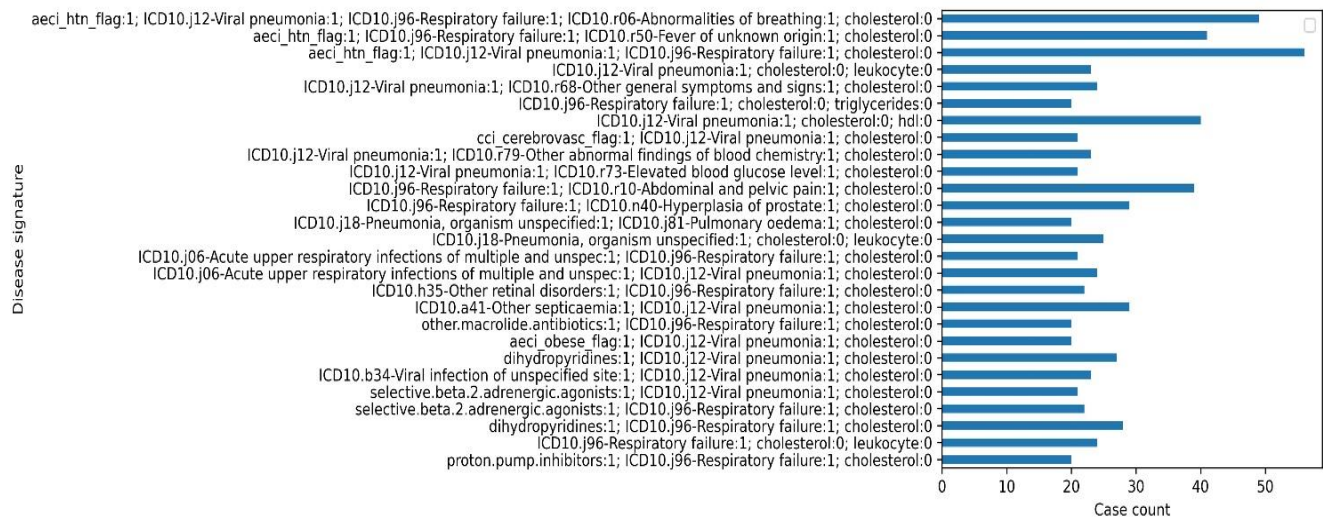

**Supplementary Figure 8.** Disease signatures with serum cholesterol (LDL) levels below 78.23 mg/dl reported in Cohort 2.

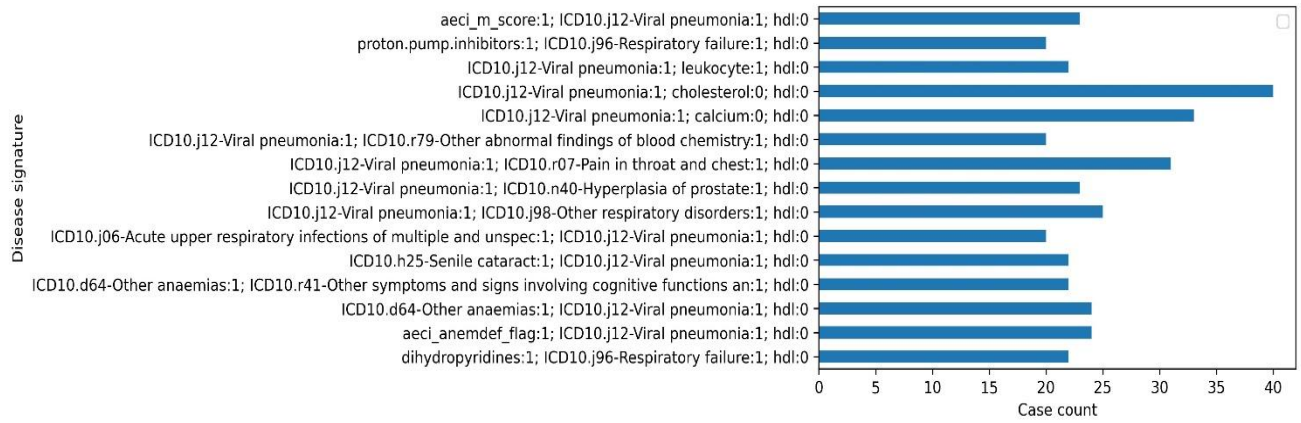

**Supplementary Figure 9.** Disease signatures with serum HDL levels below 44.35 mg/dl reported in Cohort 2.

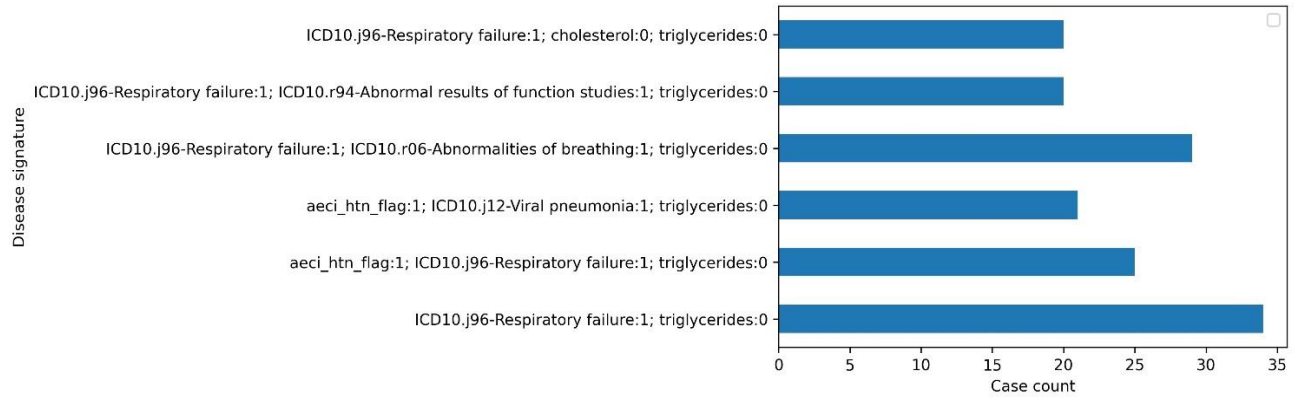

**Supplementary Figure 10.** Disease signatures with serum triglyceride levels below 73.05 mg/dl reported in Cohort 2.
